# CD4 Cell Count and the Risk of AIDS or Death in HIV-Infected Adults on Combination Antiretroviral Therapy with a Suppressed Viral Load: A Longitudinal Cohort Study from COHERE

The Opportunistic Infections Project Team of the Collaboration of Observational HIV Epidemiological Research in Europe (COHERE) in EuroCoord\*

## Abstract

**Background:** Most adults infected with HIV achieve viral suppression within a year of starting combination antiretroviral therapy (cART). It is important to understand the risk of AIDS events or death for patients with a suppressed viral load.

**Methods and Findings:** Using data from the Collaboration of Observational HIV Epidemiological Research Europe (2010 merger), we assessed the risk of a new AIDS-defining event or death in successfully treated patients. We accumulated episodes of viral suppression for each patient while on cART, each episode beginning with the second of two consecutive plasma viral load measurements  $<50$  copies/ $\mu\text{l}$  and ending with either a measurement  $>500$  copies/ $\mu\text{l}$ , the first of two consecutive measurements between 50–500 copies/ $\mu\text{l}$ , cART interruption or administrative censoring. We used stratified multivariate Cox models to estimate the association between time updated CD4 cell count and a new AIDS event or death or death alone. 75,336 patients contributed 104,265 suppression episodes and were suppressed while on cART for a median 2.7 years. The mortality rate was 4.8 per 1,000 years of viral suppression. A higher CD4 cell count was always associated with a reduced risk of a new AIDS event or death; with a hazard ratio per 100 cells/ $\mu\text{l}$  (95% CI) of: 0.35 (0.30–0.40) for counts  $<200$  cells/ $\mu\text{l}$ , 0.81 (0.71–0.92) for counts 200 to  $<350$  cells/ $\mu\text{l}$ , 0.74 (0.66–0.83) for counts 350 to  $<500$  cells/ $\mu\text{l}$ , and 0.96 (0.92–0.99) for counts  $\geq 500$  cells/ $\mu\text{l}$ . A higher CD4 cell count became even more beneficial over time for patients with CD4 cell counts  $<200$  cells/ $\mu\text{l}$ .

**Conclusions:** Despite the low mortality rate, the risk of a new AIDS event or death follows a CD4 cell count gradient in patients with viral suppression. A higher CD4 cell count was associated with the greatest benefit for patients with a CD4 cell count  $<200$  cells/ $\mu\text{l}$  but still some slight benefit for those with a CD4 cell count  $\geq 500$  cells/ $\mu\text{l}$ .

Please see later in the article for the Editors' Summary.

**Citation:** The Opportunistic Infections Project Team of the Collaboration of Observational HIV Epidemiological Research in Europe (COHERE) in EuroCoord (2012) CD4 Cell Count and the Risk of AIDS or Death in HIV-Infected Adults on Combination Antiretroviral Therapy with a Suppressed Viral Load: A Longitudinal Cohort Study from COHERE. PLoS Med 9(3): e1001194. doi:10.1371/journal.pmed.1001194

**Academic Editor:** John Bartlett, Duke University Medical Center, United States of America

**Received:** August 11, 2011; **Accepted:** February 9, 2012; **Published:** March 20, 2012

**Copyright:** © 2012 Collaboration of Observational HIV Epidemiological Research in Europe (COHERE). This is an open-access article distributed under the terms of the Creative Commons Attribution License, which permits unrestricted use, distribution, and reproduction in any medium, provided the original author and source are credited.

**Funding:** The COHERE study group has received generic funding from: Agence Nationale de Recherches sur le SIDA et les Hépatites Virales (ANRS), France; HIV Monitoring Foundation, The Netherlands; and the Augustinus Foundation, Denmark. COHERE, which receives funding from the European Union Seventh Framework Programme (FP7/2007–2013) under EuroCoord grant agreement n° 260694. A list of the funders of the participating cohorts can be found on the Regional Coordinating Centre websites at <http://www.cphiv.dk/COHERE/tabid/295/Default.aspx> and <http://etudes.isped.u-bordeaux2.fr/cohere>. This project was funded by unrestricted grants from the Emile Dreyfuss Foundation, Basel, Switzerland and the Stiftung für Infektiologie Beider Basel, Basel, Switzerland. Jim Young and Heiner C. Bucher are supported by Santésuisse and the Gottfried and Julia-Bangerter-Rhyner-Foundation. These funders had no role in study design, data collection and analysis, decision to publish, or preparation of the manuscript.

**Competing Interests:** HCB has received travel grants, honoraria and unrestricted research grants from various pharmaceutical companies, including GlaxoSmithKline (GSK), Bristol-Myers Squibb (BMS), Gilead, Janssen, Roche, Abbott, Tibotec, Boehringer-Ingelheim, and ViiV Healthcare; HF has received payment for participation on advisory boards, unrestricted educational grants or travel grants from Abbott, BMS, ViiV Healthcare, Roche, Gilead, MSD, Boehringer-Ingelheim, and Tibotec-Janssen, and unrestricted research support from Gilead, MSD, and Roche; FG has received honoraria for participation on advisory boards, unrestricted educational grants or travel grants from Abbott, BMS, ViiV Healthcare, Gilead, MSD, Boehringer-Ingelheim, and Tibotec-Janssen; GC has received honoraria from Roche; PR has served as a scientific advisor to Boehringer Ingelheim Pharmaceuticals, BMS, Gilead Sciences, GSK, ViiV Healthcare, Merck, Theratechnologies, Tibotec Therapeutics, Tobira Therapeutics, and Ferrer, has served on data and safety monitoring boards and endpoint adjudication committees for Tibotec Therapeutics, has received honoraria for speaking engagements at scientific conferences from Boehringer Ingelheim Pharmaceuticals, BMS, Gilead Sciences, GSK, and Theratechnologies, has received research support from Gilead Sciences, ViiV Healthcare, Tibotec, BMS, Merck, Abbott, and Boehringer Ingelheim Pharmaceuticals; JMM has received payment for participation on advisory boards, consultancy or lecturing from Abbott, Boehringer-Ingelheim, BMS, Cubist, GSK, Gilead Sciences, Janssen-Cilag, Merck, Novartis, Pfizer, Roche, Schering-Plough, Theravance, and ViiV. JY, MP, LM, SA, SG, FR, BG, MS, NO, OK, AC, SDW, JM, JK, CC, and JG all declare no conflicts of interest.

**Abbreviations:** cART, combination antiretroviral therapy; COHERE, Collaboration of Observational HIV Epidemiological Research in Europe; HR, hazard ratio; IQR, interquartile range; NRTI, nucleoside (or nucleotide) reverse-transcriptase inhibitor.

\* E-mail: [jyoung@uhbs.ch](mailto:jyoung@uhbs.ch)

† Membership of COHERE is provided in the Acknowledgments.

## Introduction

More than 90% of those infected with HIV now achieve viral suppression within a year of starting a combination antiretroviral therapy (cART) [1,2]. Patients with a suppressed viral load now represent the majority of cART recipients. Previous cohort studies have shown that the CD4 cell count when starting cART is the most important prognostic factor for clinical outcome, but these studies have focused on cART-naïve patients and have ignored treatment changes and periods of detectable viral load [3,4].

This study considers the prognostic value of a CD4 cell count, not when starting cART, but while a patient is being successfully treated, that is, while a patient is on cART with a suppressed viral load. For many patients, viral suppression is not continuous but episodic with periods of viremia as a result of treatment interruption or treatment failure. We selected patients from the Collaboration of Observational HIV Epidemiological Research in Europe (COHERE) database, accumulated episodes of viral suppression for each patient while on cART, and used these episodes to estimate the association between a time updated CD4 cell count and progression to a new AIDS-defining event or death, or death alone.

## Methods

### The COHERE Collaboration

COHERE is a collaboration of European HIV cohorts (<http://www.cohere.org/>). The 22 cohorts participating in this project provided data in a standardised format to one of two regional co-ordinating centres, where basic error checks were carried out and duplicate records removed for patients followed in more than one cohort. Data collected included information on patient characteristics, antiretroviral therapy, CD4 cell count, HIV RNA viral load, AIDS events, and causes of death. This analysis was based on data merged in 2010 when, for the first time, additional data were collected on co-infection with and treatment for hepatitis B or C, and on the prophylaxis and treatment of opportunistic infections. Patients included in the 2010 merger had to have this additional information and follow-up after 1 January 1997.

### Patient Inclusion

Patients were eligible for our analyses if they achieved one or more episodes of viral suppression while on cART. Optimal viral suppression is defined as a viral load below the level of detection or below 20–75 copies/ $\mu$ l depending on the assay used; however, isolated transient detectable viral loads below 400 copies/ $\mu$ l are not uncommon in successfully treated patients and are not thought to represent an increased risk of virologic failure [5]. We defined the start of a suppression episode as the second of two consecutive viral load measurements below 50 copies/ $\mu$ l (or below the limit of detection) while on cART. We defined the end of a suppression episode as a viral load measurement below 50 copies/ $\mu$ l (or undetectable) then followed by either (1) a measurement greater than 500 copies/ $\mu$ l, (2) the first of two consecutive measurements between 50 and 500 copies/ $\mu$ l, (3) an interruption in cART, or (4) no further viral load measurements. Note that our definition allows for isolated viral load measurements of between 50 and 500 copies/ $\mu$ l within a suppression episode. We defined cART as any three antiretroviral drugs from any drug class, except that three nucleoside (or nucleotide) reverse-transcriptase inhibitors (NRTIs) was only considered cART if taken after another cART regimen.

Patients with at least one suppression episode were then included in our time to event analyses if pre-specified covariates were also available. Patients had to have a CD4 cell count measured within 6

months prior to the start of an episode or within an episode, and CD4 cell counts were updated over time in our analyses so that each episode was represented by a set of intervals, one interval per CD4 cell count, using the counting process method of representing time to event data. Patients with more than one suppression episode contributed more than one set of intervals to our analyses, but were not at risk between episodes (see [6]). We deleted any interval where the CD4 cell count was measured before the patient was 16 y old. Other covariates were age (in the year 2000), gender, intravenous drug use as the likely mode of HIV transmission, viral load, co-infection with hepatitis B or C, cART category, and the number of prior cART regimens, with these last three covariates updated for each interval. For a first suppression episode, we used a last viral load prior to starting cART as the viral load covariate; for a subsequent episode, we used the highest viral load between the previous and current episode as the covariate.

### Statistical Methods

Our primary outcome was time to a first new AIDS event or death while suppressed and on cART, with an AIDS event defined as one of the conditions listed in Appendix B of the 1993 US Centers for Disease Control (CDC) AIDS surveillance case definition [7]. We used Cox proportional hazards models to estimate the association between an AIDS event or death and CD4 cell count, with CD4 cell count represented by a linear spline with three knots at 200, 350, and 500 cells/ $\mu$ l [8]. These knots correspond to thresholds in treatment guidelines below; below these three thresholds, antiretroviral treatment is essential, recommended, or should be considered, respectively [5]. A hazard ratio (HR)  $<1.0$  for any of the four components of this spline implies that a higher CD4 cell count (per 100 cells/ $\mu$ l) is associated with a lower risk of progression and is therefore a measure of the benefit that a patient can expect if their CD4 cell count increases above any current level within the range covered by that spline component. Our models included the baseline and time updated covariates described above. We stratified our models by cohort, so that each cohort had its own non-parametric baseline hazard function, but we assumed the effect of each covariate was the same in each cohort [9]. To assess whether the hazards associated with CD4 cell count were constant over time (i.e., proportional hazards), we fitted a model with interaction terms between log suppression time and CD4 cell count, with these interactions centred around the geometric mean suppression time [10–12].

We carried out six planned sensitivity analyses to check that our estimates were stable. Assays have become more sensitive over time, so we re-fitted our model with (1) a suppression episode re-defined as a viral load below 400 copies/ $\mu$ l—to simulate constant use over time of a less sensitive assay; and (2) with the analysis restricted to suppression episodes starting after 1 January 2001—to largely omit episodes found using less sensitive assays [13]. We varied the period of time after a last viral load measurement within which new AIDS events or death were accepted as outcomes if suppression was ongoing. We considered such events as outcomes if they occurred within 180 d of a last viral load where the patient was still suppressed at this last measurement, but in sensitivity analyses we re-fitted our model assuming (3) shorter and (4) longer periods (90 and 270 d, respectively). We dropped covariates from our model to retain episodes lost from our analyses because of missing covariates. We re-fitted our model (5) without viral load as a covariate because for many patients, we did not have a viral load measured prior to starting cART; and (6) without co-infection with hepatitis as a covariate, because then we could include additional patients in our analysis from the 2008 merger of the COHERE database [14]. Finally in a single unplanned sensitivity analysis, we assessed

**Table 1.** COHERE patients with continuous or episodic viral suppression while on cART.

| Patient Characteristics                                         | Included (n=66,147) | Excluded (n=110,438) |
|-----------------------------------------------------------------|---------------------|----------------------|
| Age at 2,000, y, median (IQR)                                   | 37 (32–44)          | 35 (28–41)           |
| Percent female                                                  | 27                  | 29                   |
| Percent ever diagnosed with AIDS                                | 26                  | 25                   |
| Percent transmission by drug use                                | 14                  | 17                   |
| Percent recorded as of European nationality <sup>a</sup>        | 43                  | 34                   |
| Year first suppression episode began, median (IQR)              | 2003 (2000–2006)    |                      |
| CD4 cell count, cells/ $\mu$ l, median (IQR) <sup>b</sup>       | 396 (256–565)       |                      |
| HIV RNA viral load, log 10 copies/ml, median (IQR) <sup>c</sup> | 4.6 (3.5–5.2)       |                      |
| Percent hepatitis B or C <sup>b</sup>                           | 9                   |                      |
| Percent cART category <sup>b</sup>                              |                     |                      |
| NNRTI                                                           | 34                  |                      |
| PI boosted with ritonavir                                       | 30                  |                      |
| PI without ritonavir                                            | 25                  |                      |
| Other <sup>d</sup>                                              | 11                  |                      |
| Percent CD4 cell category, cells/ $\mu$ l <sup>b</sup>          |                     |                      |
| <50                                                             | 1                   |                      |
| 50 to <200                                                      | 15                  |                      |
| 200 to <350                                                     | 26                  |                      |
| 350 to <500                                                     | 25                  |                      |
| $\geq$ 500                                                      | 34                  |                      |

Note that the number of patients included in the main analyses of primary and secondary outcomes ( $n=66,147$ ) is lower than the number of patients in Tables 2–4 with at least one suppression episode ( $n=75,336$ ) because viral load prior to starting cART was not known for some patients.

<sup>a</sup>Nationality was not recorded for 40% of patients included in these analyses and for 50% of patients excluded from these analyses.

<sup>b</sup>At the start of a first suppression episode. Note that 103 patients that did not contribute a first episode to the main analyses because either no CD4 cell counts were available for this episode or this episode occurred while the patient was still under the age of 16.

<sup>c</sup>Last viral load before starting combination therapy. Note that a further 4,211 patients did not contribute a first episode to the main analyses because their viral load before starting combination therapy was not known (although these patients contributed a first episode to the sensitivity analysis without this covariate).

<sup>d</sup>Other: at least one protease inhibitor (PI) and one non-nucleoside reverse-transcriptase inhibitor (NNRTI), 5%; three NRTIs, 3%; at least two PIs (other than ritonavir) but no NNRTI, 2%; any therapy including integrase or fusion inhibitors, 1%.

doi:10.1371/journal.pmed.1001194.t001

whether the risk of progression differed between first and subsequent episodes of viral suppression. We added an additional covariate to the analysis of the primary outcome, either taking value zero for a first suppression episode and one otherwise, or taking value zero for a first suppression episode and the number of years between successive episodes otherwise.

Our secondary outcome was time to death while both suppressed and on cART. We classified a death as “related to HIV” if death was attributed at least in part to an “AIDS defining event” or an “invasive bacterial infection.” If these two causes

were not mentioned but other causes of death were given, we classified a death as “unrelated to HIV.” If no causes of death were given, we classified a death as of “unknown cause.” We then fitted a Cox model with different cause-specific hazards for CD4 cell count [15], again with CD4 cell count represented by a linear spline and with the same covariates as before.

Analyses were carried out with the PHREG procedure in SAS version 9.2; survival curves were plotted with the Survival package version 2.36-2 in R version 2.12.1. We report model estimates as HRs, each with a 95% CI.

**Table 2.** Event rates in CD4 strata among the 75,336 patients with at least one suppression episode while on cART: event rates per 1,000 y of suppressed viral load (number of events) by outcome.

| Most Recent CD4 Cell Count (Cells/ $\mu$ l) | First New AIDS Event or Death from Any Cause |       | Death from Any Cause |       | Death from Causes Unrelated to HIV |       |
|---------------------------------------------|----------------------------------------------|-------|----------------------|-------|------------------------------------|-------|
| <50                                         | 94.9                                         | (54)  | 64.8                 | (38)  | 25.6                               | (15)  |
| 50 to <200                                  | 30.5                                         | (489) | 20.0                 | (325) | 14.1                               | (230) |
| 200 to <350                                 | 12.0                                         | (548) | 6.9                  | (318) | 5.2                                | (240) |
| 350 to <500                                 | 7.9                                          | (487) | 3.8                  | (240) | 2.9                                | (184) |
| $\geq$ 500                                  | 5.2                                          | (679) | 2.4                  | (315) | 1.9                                | (253) |

doi:10.1371/journal.pmed.1001194.t002

**Table 3.** Event rates in CD4 strata among the 75,336 patients with at least one suppression episode while on cART: event rates per 1,000 y of suppressed viral load (number of events) for a first new AIDS event, with each event then classified as either an opportunistic infection or a HIV related neoplasm.

| Most Recent CD4 Cell Count (Cells/ $\mu$ l) | First New AIDS Event |       | Opportunistic Infection |       | HIV Related Neoplasm |       |
|---------------------------------------------|----------------------|-------|-------------------------|-------|----------------------|-------|
| <50                                         | 29.9                 | (17)  | 21.1                    | (12)  | 8.8                  | (5)   |
| 50 to <200                                  | 10.8                 | (173) | 7.5                     | (121) | 3.2                  | (51)  |
| 200 to <350                                 | 5.2                  | (239) | 3.4                     | (155) | 1.8                  | (82)  |
| 350 to <500                                 | 4.0                  | (249) | 2.5                     | (153) | 1.6                  | (96)  |
| $\geq$ 500                                  | 2.9                  | (376) | 2.0                     | (256) | 0.9                  | (119) |

Four first new AIDS events could not be classified as either an opportunistic infection or an HIV-related neoplasm.  
doi:10.1371/journal.pmed.1001194.t003

## Results

### Patient Characteristics

Of the 176,585 patients in the 2010 merger of COHERE, 75,336 patients provided 104,265 suppression episodes while on cART (Text S1); 71% of these patients had just a single episode. The median length of a suppression episode was 1.7 y (interquartile range [IQR] 0.7–3.5); the median total time suppressed while on cART was 2.7 y (IQR 1.2–5.1) per patient; the estimated average gain in CD4 cell count while suppressed was 53 cells/ $\mu$ l per year. The main analyses of primary and secondary outcomes were based on 66,147 patients with a viral load measured prior to starting cART. Patients contributing to our main analyses tended to be slightly older, were less likely to be either female or infected through drug use, and were more likely to be recorded as of European origin than other patients in this merger of COHERE (Table 1). Few patients (1%) started their first suppression episode with a CD4 cell count below 50 cells/ $\mu$ l and many (34%) started with a CD4 cell count above 500 cells/ $\mu$ l.

### Event Rates

The rate of progression to a first new AIDS event or death was 8.9 per 1,000 y of suppression; the mortality rate was 4.8 per 1,000 y of suppression. Both rates showed a gradient that depends on CD4 cell count with the highest rates in those with <50 CD4 cells/ $\mu$ l at the time of the event (Table 2). Even mortality from causes thought unrelated to HIV (Table 2) and the rate of HIV related neoplasms (Table 3) increased with decreasing CD4 cell count. The rate of progression to a first new AIDS event or death

decreased over time in all CD4 strata (Table 4), except where patients had a low CD4 cell count (0 to <200 CD4 cells/ $\mu$ l).

A time updated Kaplan Meier plot illustrates the relatively low probability of AIDS event-free survival—roughly 70% after 10 y of suppression—should a patient's CD4 cell count remain below 200 cells/ $\mu$ l while suppressed (Figure 1A) [16]. In contrast, the probability of AIDS event-free survival was roughly 95% after 10 y of suppression for patients maintaining a CD4 cell count of 500 cells/ $\mu$ l or more while suppressed. It is important to note that CD4 cell count was time dependent and updated when calculating these probabilities. Therefore this plot shows probabilities for hypothetical patients whose CD4 count remains within the same CD4 stratum while suppressed [16]. The roughly parallel lines in the plot of AIDS event-free survival (log log scale) against time (log scale) suggest that a proportional hazards model was appropriate for these data (Figure 1B) [11,12].

### Time to AIDS or Death

A Cox proportional hazards model for time to a first new AIDS event or death also showed a gradient that depends on CD4 cell count (Table 5). A higher CD4 cell count was associated with a much greater decrease in the risk of progression when a patient had a CD4 cell count below 200 cells/ $\mu$ l (HR 0.35, 0.30–0.40, per 100 cells/ $\mu$ l) than when a patient had a CD4 cell count above 500 cells/ $\mu$ l. However, even at a CD4 cell count above 500 cells/ $\mu$ l, a higher CD4 cell count was associated with a slightly reduced risk of progression (HR 0.96, 0.92–0.99, per 100 cells/ $\mu$ l). A higher CD4 cell count had intermediate benefit for CD4 cell counts in the range from 200 to 350 and from 350 to 500 cells/ $\mu$ l.

The same model suggests that progression was more likely for older patients (HR 1.42, 1.36–1.49, per 10 y), for those infected by drug use (HR 1.95, 1.73–2.2), and for those with hepatitis B or C (HR 1.26, 1.05–1.51). Progression was also more likely for patients on cART regimens typically used after virologic failure (boosted protease inhibitor or other cART) compared to non-NRTI-based cART (the reference category).

Plots of weighted Schoenfeld residuals (not shown) suggest a proportional hazards assumption was reasonable for these data [11]. However we also fitted a reduced model, with CD4 cell count represented by a linear spline with a just single knot at 200 cells/ $\mu$ l and with interaction terms between each of the two components of this spline and log suppression time. For patients with a CD4 cell count below 200 cells/ $\mu$ l (HR 0.21, 0.19–0.24, per 100 cells/ $\mu$ l), the interaction (HR 0.51, 0.48–0.54) implied that with a higher CD4 cell count, the risk of progression was not constant but decreased over time. For patients with a CD4 cell count above 200 cells/ $\mu$ l (HR 0.92, 0.90–0.94, per 100 cells/ $\mu$ l), the interaction (HR 1.02, 1.00–1.05) implied that the risk of progression was constant over

**Table 4.** Event rates in CD4 strata among the 75,336 patients with at least one suppression episode while on cART: event rates per 1,000 y of suppressed viral load (number of events) over time for the primary outcome (a first new AIDS event or death).

| Most Recent CD4 Cell Count (Cells/ $\mu$ l) | <1 y  |       | 1 to <2 y |       | $\geq$ 2 y |       |
|---------------------------------------------|-------|-------|-----------|-------|------------|-------|
| <50                                         | 108.5 | (36)  | 73.2      | (7)   | 77.6       | (11)  |
| 50 to <200                                  | 35.4  | (251) | 22.7      | (89)  | 29.7       | (149) |
| 200 to <350                                 | 18.2  | (247) | 9.8       | (108) | 9.2        | (193) |
| 350 to <500                                 | 11.5  | (160) | 7.6       | (105) | 6.5        | (222) |
| $\geq$ 500                                  | 8.7   | (173) | 5.3       | (128) | 4.4        | (378) |

doi:10.1371/journal.pmed.1001194.t004

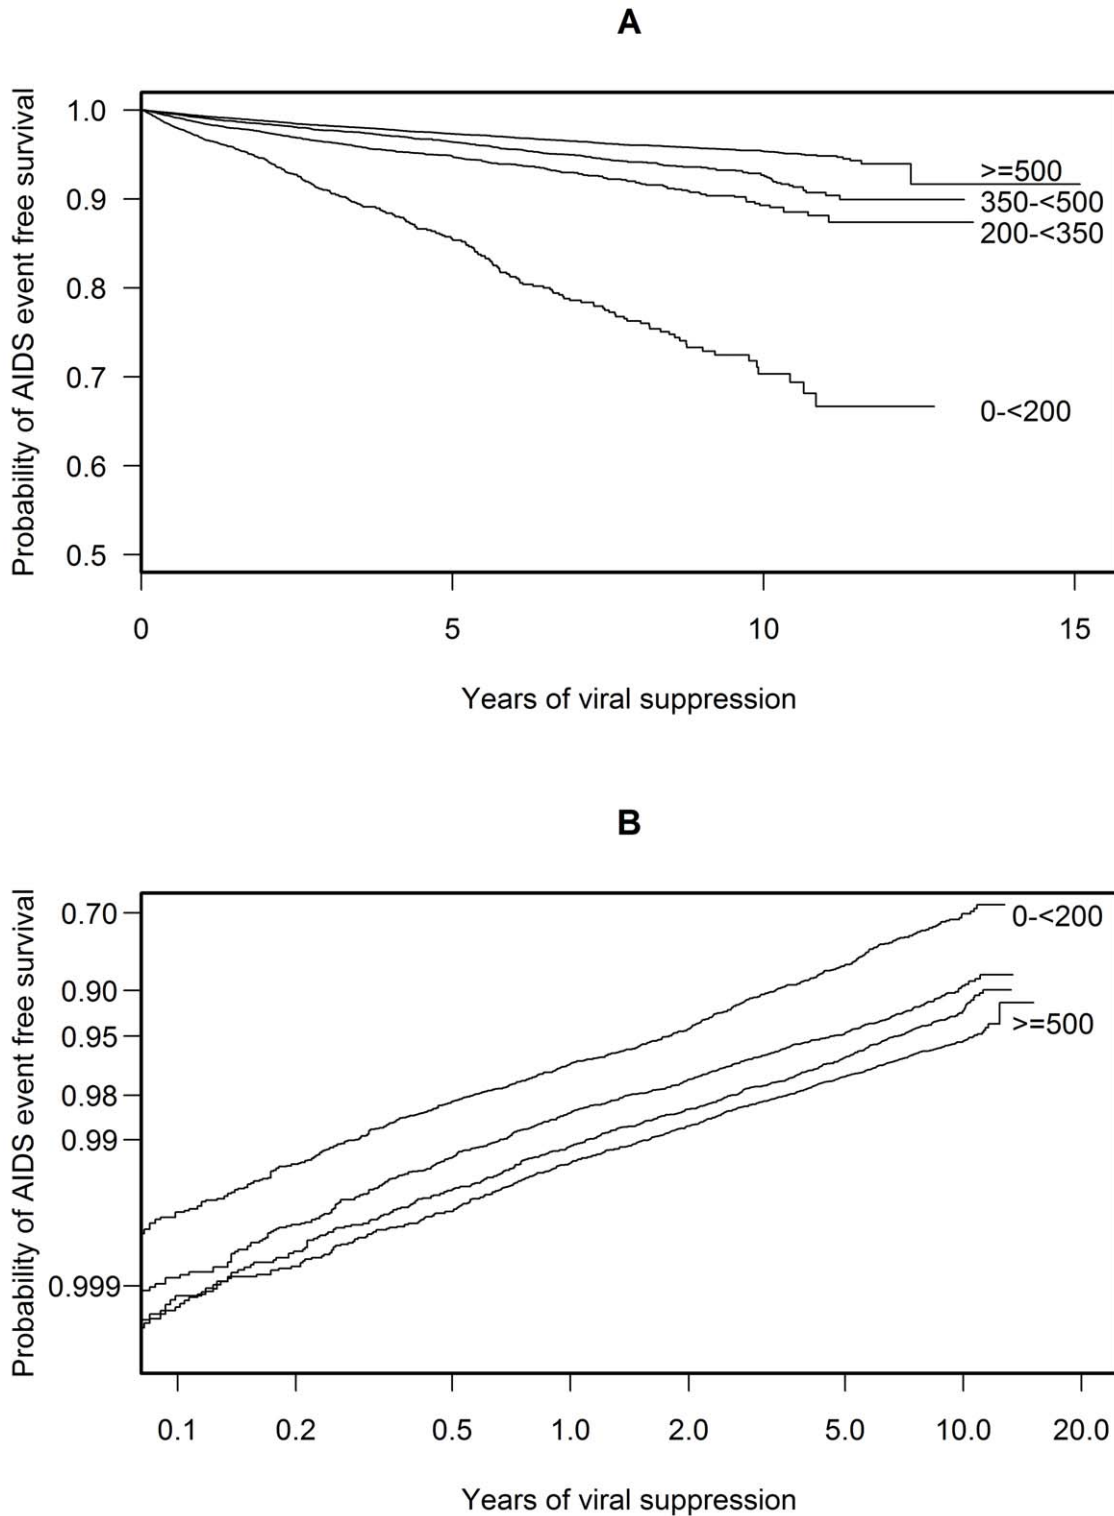

**Figure 1. Probability plots of AIDS event-free survival over time.** These plots apply to hypothetical patients whose CD4 cell count remains within the same CD4 stratum while on cART with a suppressed viral load. Plot (A) shows a Kaplan Meier plot of the probability of AIDS event-free survival over time. Plot (B) shows a plot of  $\log(-\log[\text{probability of AIDS event-free survival}])$  against  $\log(\text{time})$ . The roughly parallel lines of plot (B) suggest that a proportional hazards model is appropriate for these data. Both plots use a method appropriate for a time-dependent CD4 cell count (see [16]).

doi:10.1371/journal.pmed.1001194.g001

**Table 5.** HR estimates and their 95% CIs from multivariate Cox proportional hazard models for both the primary and secondary outcome in 66,147 patients on cART with a suppressed viral load.

| Model Parameter                                                         | Primary Outcome: Time to a First New AIDS Event or Death (1,838 Events) |           | Secondary Outcome: Time to Death from Any Cause (1,000 Events) |           |
|-------------------------------------------------------------------------|-------------------------------------------------------------------------|-----------|----------------------------------------------------------------|-----------|
|                                                                         | HR                                                                      | 95% CI    | HR                                                             | 95% CI    |
| Age (per 10 y)                                                          | 1.42                                                                    | 1.36–1.49 | 1.80                                                           | 1.70–1.91 |
| Female                                                                  | 0.99                                                                    | 0.88–1.11 | 0.77                                                           | 0.65–0.90 |
| Transmission by drug use                                                | 1.95                                                                    | 1.73–2.20 | 2.86                                                           | 2.45–3.33 |
| Hepatitis B or C <sup>a</sup>                                           | 1.26                                                                    | 1.05–1.51 | 1.44                                                           | 1.11–1.88 |
| Number of prior cART regimens <sup>a</sup>                              | 0.99                                                                    | 0.97–1.02 | 1.02                                                           | 0.99–1.05 |
| HIV RNA (per log 10 copies) <sup>b</sup>                                | 1.02                                                                    | 0.98–1.06 | 1.00                                                           | 0.95–1.05 |
| cART (with NNRTI as the reference category) <sup>a</sup>                |                                                                         |           |                                                                |           |
| Three NRTIs                                                             | 1.14                                                                    | 0.93–1.39 | 1.36                                                           | 1.06–1.76 |
| PI without ritonavir                                                    | 1.08                                                                    | 0.93–1.25 | 1.19                                                           | 0.98–1.46 |
| PI boosted with ritonavir                                               | 1.17                                                                    | 1.04–1.32 | 1.13                                                           | 0.95–1.33 |
| Other <sup>c</sup>                                                      | 1.25                                                                    | 1.05–1.48 | 1.37                                                           | 1.10–1.71 |
| CD4 cell count (per 100 cells/ $\mu$ l) as a linear spline <sup>d</sup> |                                                                         |           |                                                                |           |
| 0 to <200                                                               | 0.35                                                                    | 0.30–0.40 | 0.32                                                           | 0.27–0.39 |
| 200 to <350                                                             | 0.81                                                                    | 0.71–0.92 | 0.75                                                           | 0.63–0.89 |
| 350 to <500                                                             | 0.74                                                                    | 0.66–0.83 | 0.68                                                           | 0.58–0.80 |
| $\geq$ 500                                                              | 0.96                                                                    | 0.92–0.99 | 0.98                                                           | 0.93–1.03 |

<sup>a</sup>Time-dependent covariate.

<sup>b</sup>Last viral load prior to starting cART or highest viral load recorded between episodes.

<sup>c</sup>Other: at least one protease inhibitor (PI) and one non-nucleoside reverse-transcriptase inhibitor (NNRTI), at least two PIs (other than ritonavir) but no NNRTI; any therapy including integrase or fusion inhibitors.

<sup>d</sup>Time-dependent covariate. A HR<1.0 for any of the four components of this spline implies that a higher CD4 cell count (per 100 cells/ $\mu$ l) is associated with a lower risk of progression and is therefore a measure of the benefit that a patient can expect if their CD4 cell count increases above any current level within the range covered by that spline component.

doi:10.1371/journal.pmed.1001194.t005

time. The increasing benefit over time of a higher CD4 cell count for patients with low CD4 cell counts is consistent with the increased event rate after 2 y in Table 4 for patients with low CD4 cell counts and the slight increase in slope after 2 y in Figure 1B for patients with low CD4 cell counts.

HRs for the spline representing CD4 cell count were similar in all six planned sensitivity analyses (Text S1). In the unplanned sensitivity analysis, there was no evidence that the risk of progression differed between first and subsequent episodes of viral suppression (Text S1). The estimated average loss in CD4 cell count between the end of one suppression episode and the beginning of the next was 23 cells/ $\mu$ l per year.

### Time to Death

A Cox proportional hazards model for time to death from any cause showed a similar gradient with respect to CD4 cell count (Table 5). There was, however, no real benefit in a higher CD4 cell count for patients with a CD4 cell count above 500 cells/ $\mu$ l (HR 0.98, 0.93–1.03, per 100 cells/ $\mu$ l). And, unlike the primary outcome, women had a lower risk of death (HR 0.77, 0.65–0.90) and cART with three NRTIs was associated with a higher risk of death (HR 1.36, 1.06–1.76).

In a competing risks analysis, we fitted a reduced model with CD4 cell count represented by a linear spline with a just single knot at 200 cells/ $\mu$ l. For patients with a CD4 cell count below 200 cells/ $\mu$ l, a higher CD4 cell count had the most benefit for deaths attributed at least in part to HIV and for deaths of unknown cause (HR 0.20, 0.14–0.30, and 0.22, 0.15–0.32, per 100 cells/ $\mu$ l, respectively), but still had appreciable benefit for deaths thought

unrelated to HIV (HR 0.32, 0.26–0.38, per 100 cells/ $\mu$ l). For patients with a CD4 cell count above 200 cells/ $\mu$ l, a higher CD4 cell count had the most benefit for deaths attributed at least in part to HIV (HR 0.58, 0.49–0.70, per 100 cells/ $\mu$ l), but still had some benefit for deaths of unknown cause and for deaths thought unrelated to HIV (HR 0.86, 0.79–0.94, and 0.88, 0.85–0.91, per 100 cells/ $\mu$ l, respectively).

### Discussion

This study shows that a higher CD4 cell count is associated with a reduced risk of clinical progression in patients on cART with a suppressed viral load. For patients with a low CD4 cell count, a higher CD4 cell count becomes even more beneficial over time. The benefits associated with a higher CD4 cell count are similar for patients with a CD4 cell count either between 200 and 350 cells/ $\mu$ l or between 350 and 500 cells/ $\mu$ l. Even patients with a CD4 cell count above 500 cells/ $\mu$ l will benefit to a slight extent from a higher CD4 cell count, although there is little if any association between this and the risk of death. Absolute risk reductions in this highest CD4 cell category, however, will be small at best and of little clinical relevance for most patients.

The benefits seen here appear to apply irrespective of whether viral suppression is continuous or episodic. Additional results from the unplanned sensitivity analysis suggest that, having adjusted for other covariates (including a time updated CD4 cell count), patients with episodic suppression were no more likely to progress than patients with continuous suppression. This does not imply that a period of viremia is without negative consequences. Rather

these results are consistent with immunological and epidemiological evidence that the negative consequences of viremia are damage to the immune system and a subsequent decline in CD4 cell count [17–20]. For those patients with more than one episode of viral suppression, the estimated loss in CD4 cell count between the end of one suppression episode and the beginning of the next was 23 cells/ $\mu$ l per year.

Our estimates of the benefit associated with a higher CD4 cell count have relatively narrow CIs, are robust across sensitivity analyses, and show logical differences between different outcomes and different causes of death. Although many patients were excluded from this merger of COHERE or from the main analysis because of missing covariate information, sensitivity analyses without these covariates and with these patients included suggest that these exclusions have not had a material effect on estimates. We used time updated CD4 cell count to model the risk of progression because in clinical practice decisions are based on the most recent data [10,21]. We would underestimate the benefit of a higher CD4 cell count were we to base an analysis on the CD4 cell count at the beginning of a suppression episode because of the decay over time in the predictive value of a first observation [10,19,22]. Nevertheless we may still underestimate the benefit associated with a higher CD4 cell count to some extent, possibly because of infrequent updating in some patients but more likely because of the considerable measurement error in CD4 cell counts [21,23,24]. We did not adjust for primary prophylaxis as this is on a causal pathway between a low CD4 cell count and outcome (see [25]). The use of prophylactic drugs will result in an underestimate of the benefit associated with a higher CD4 cell count for patients with a low CD4 cell count relative to the benefit one would expect in the absence of any prophylaxis.

Previous studies have shown an increased risk of AIDS or death with lower time updated CD4 cell count in untreated patients and in treatment experienced patients [19,26], and with lower CD4 cell count at the start of treatment or after 6 mo of treatment in treatment-naïve patients [3,4,22]. In all these studies, CD4 cell count was the strongest prognostic factor for disease progression; viral load was at best only weakly predictive of progression in models with time updated CD4 cell counts [19,21]. Here we show an increased risk of AIDS or death with lower time updated CD4 cell count in successfully treated patients. The mortality rate in this study was 4.8 per 1,000 y of suppression; lower than the rate of 12 or 14 per 1,000 y in treatment-naïve patients starting cART [3,27]. The event rates in Tables 2–4 show that CD4 cell count gradients are seen in unadjusted rates; otherwise these rates are of limited value to clinicians because of differences between cohorts in rates of AIDS and death, with differences probably due to different methods of diagnosing disease and ascertaining death [28]. However the association between CD4 cell count and AIDS or death appears much more stable across cohorts [28], consistent with our analytic approach where each cohort had a separate baseline hazard but covariate effects were assumed to be the same in each cohort.

The results of this study provide further indirect evidence for starting cART when a patient's CD4 cell count is between 350 and 500 cells/ $\mu$ l [29,30]. In this study the benefits associated with a higher CD4 cell count were similar over a range of CD4 cell counts from 200 to 500 cells/ $\mu$ l. Above a count of 500 cells/ $\mu$ l, a higher CD4 cell count was associated with a slightly reduced risk of an AIDS event but had little association with the risk of death; hence even earlier treatment with a CD4 cell count above 500 cells/ $\mu$ l might be appropriate for patients with characteristics associated with slower immune recovery—older patients, those with a drug addiction, or co-infected with viral hepatitis [31–33];

such patients had a greater risk of progression in our study. A higher CD4 cell count was also associated with a reduced risk of death from causes thought unrelated to HIV. This finding suggests that the distinction between causes of death related and unrelated to HIV is rather arbitrary in successfully treated patients, and that there is a need for more sophisticated recording and review of causes of death to avoid underestimating the burden of HIV infection [28,34,35].

In several studies, a CD4 cell count of around 200 cells/ $\mu$ l has been seen as an important threshold [3,21,22]. The strength of time updated CD4 cell count as a prognostic factor for survival has led to a suggestion that “there is a threshold beyond which immune reconstitution may be compromised” [22]. Others argue that patients starting treatment with low counts do not seem to remain disadvantaged if the CD4 cell count at the start of treatment is not predictive of survival once adjusted for a value at 6 mo [4]. We see our results—with a higher CD4 cell count becoming even more important over time for patients with low CD4 cell counts—as more consistent with the idea of lasting damage below some threshold from which recovery is difficult [18,36]. Many patients starting therapy with a CD4 cell count below 200 cells/ $\mu$ l never achieve a normal CD4 cell count even after 10 y of otherwise effective antiretroviral therapy [37], although this failure to recover could be due to factors other than a low CD4 cell count per se. Various treatment intensification strategies have failed to show any benefit in patients with low CD4 cell counts [38,39]. Despite improvements, the majority of patients in resource-limited settings still start therapy with a CD4 cell count below 200 cells/ $\mu$ l [40], so that along with improved access to treatment, earlier diagnosis and earlier treatment are also needed to reduce mortality in this setting [41].

This study shows that even though new AIDS events and death are uncommon in patients on cART with a suppressed viral load, these patients still benefit from a higher CD4 cell count. There is support in this study for starting cART when a patient's CD4 cell count is between 350 and 500 cells/ $\mu$ l and for continued vigilance when treating patients with sustained viral suppression but a low CD4 cell count.

## Supporting Information

### Text S1 Appendix: Patient selection and sensitivity analyses.

(DOC)

## Acknowledgments

### The Analysis and Writing Group included:

Jim Young (statistician), Mina Psychogiou (AMACS), Laurence Meyer (ANRS CO2 SEROCO, ANRS CO6 PRIMO, CASCADE), Sylvie Ayayi (ANRS CO3 AQUITAINE), Sophie Grabar (ANRS CO4 FHDH), Francois Raffi (ANRS CO8 COPILOTE), Peter Reiss (ATHENA), Brian Gazzard (CHIC), Mike Sharland (CHIPS), Félix Gutierrez (Co-RIS), Niels Obel (Danish HIV Cohort), Ole Kirk (EuroSIDA), José M Miro (PISCIS), Hansjakob Furrer (SHCS), Antonella Castagna (San Raffaele [IDD-HSR]), Stéphane De Wit (St Pierre, Brussels), Josefa Muñoz (VACH), Jesper Kjaer (data manager), Céline Colin (data manager), Jesper Grarup (Copenhagen RCC), Geneviève Chêne (Bordeaux RCC), Heiner Bucher (project lead).

### The Opportunistic Infections Group included:

Hansjakob Furrer (theme lead), José Miro (theme lead), Robert Zangerle (AHIVCOS), Anastasia Antoniadou (AMACS), Jade Ghosn (ANRS CO2 SEROCO, ANRS CO6 PRIMO), Philippe Morlat (ANRS CO3 AQUITAINE), Vincent Le Moing (ANRS CO8 COPILOTE), Peter Reiss (ATHENA), Martin Fisher (CHIC), Mike Sharland (CHIPS), Amanda Mocroft (EuroSIDA), Ole Kirk (EuroSIDA), Christoph Stephan (Frankfurt HIV), Enrico Girardi (ICONA), Carlo Torti (Master Cohort),

Cristina Mussini (MODENA), José Miro (PISCIS), Laura Galli (San Raffaele (IDD-HSR)), Bruno Ledergerber (SHCS), Ramón Teira (VACH).

COHERE Steering Committee

**Contributing cohorts:** Robert Zangerle (AHIVCOS), Giota Touloumi (AMACS), Josiane Warszawski (ANRS CO1 EPF/ANRS CO11 OBSERVATOIRE EPF), Laurence Meyer (ANRS CO2 SEROCO), François Dabis (ANRS CO3 AQUITAINE), Murielle Mary Krause (ANRS CO4 FHDH), Jade Ghosn (ANRS CO6 PRIMO), Catherine Lepout (ANRS CO8 COPILOTE), Frank de Wolf (ATHENA), Peter Reiss (ATHENA), Maria Prins (CASCADE), Heiner Bücher (CASCADE), Caroline Sabin (CHIC), Diana Gibb (CHIPS), Gerd Fätkenheuer (Cologne Bonn), Julia Del Amo (CoRIS), Niels Obel (Danish HIV Cohort), Claire Thorne (ECS), Amanda Mocroft (EuroSIDA), Ole Kirk (EuroSIDA), Christoph Stephan (Frankfurt), Santiago Pérez-Hoyos (GEMES-Haemo), Antoni Noguera-Julian (NENEXP and CORISPE-cat), Andrea Antinori (ICC), Antonella d'Arminio Monforte (ICONA), Norbert Brockmeyer (KOMPNET), José Ramos (Madrid Cohort), Manuel Battegay (MoCHIV), Andri Rauch (SHCS), Cristina Mussini (Modena Cohort), Pat Tookey (NSHPC), Jordi Casabona (PISCIS), José Miro (PISCIS), Antonella Castagna (San Raffaele), Stephane de Wit (St. Pierre Cohort), Tessa Goetghebuer (St Pierre Paediatric Cohort), Carlo Torti (Italian Master Cohort), Ramon Teira (VACH), Myriam Garrido (VACH). European AIDS Treatment Group: David Haerry.

**Executive committee:** Ian Weller (Chair, University College London), Jordi Casabona (PISCIS), Dominique Costagliola (FHDH), Antonella d'Arminio-Monforte (ICONA), Manuel Battegay (MoCHIV),

Maria Prins (CASCADE), Frank de Wolf (ATHENA), Jesper Grarup (Head, Copenhagen Regional Coordinating Centre), Geneviève Chêne (Head, Bordeaux Regional Co-ordinating Centre).

**Regional co-ordinating centres:** Bordeaux RCC cohorts: Céline Colin, Christine Schwimmer, Guillaume Touzeau; Copenhagen RCC cohorts: Jesper Kjær, Maria Paulsen.

**Project leaders and statistical analysis:** Julia Bohlius, Vincent Bouteloup, Heiner Bucher, Alessandro Cozzi-Lepri, François Dabis, Antonella d'Arminio Monforte, Frank de Wolf, Maria Dorrucchi, Matthias Egger, Frederik Engsig, Hansjakob Furrer, Ole Kirk, Olivier Lambotte, Charlotte Lewden, Rebecca Lodwick, Sophie Matheron, Laurence Meyer, José Miro, Amanda Mocroft, Niels Obel, Roger Paredes, Andrew Phillips, Massimo Puoti, Joanne Reekie, Caroline Sabin, Alexandra Scherrer, Colette Smit, Jonathan Sterne, Rodolphe Thiebaut, Claire Thorne, Carlo Torti, Viktor von Wyl, Linda Wittkop, Jim Young.

## Author Contributions

Conceived and designed the experiments: HB JY. Contributed the data: MP LM SA SG FR PR BG MS FG NO OK JMM HF AC SW JM HB. Analyzed the data: JY. Wrote the first draft of the manuscript: JY. Contributed to the writing of the manuscript: JY NO SG LM SW OK FG PR HF JMM GC HB. ICMJE criteria for authorship read and met: JY MP LM SA SG FR PR BG FG NO OK JMM HF AC SW JM JK CC JG GC HB. Agree with manuscript results and conclusions: JY MP LM SA SG FR PR BG MS FG NO OK JMM HF AC SW JM JK CC JG GC HB. Data management: JK CC. Project management: JG GC.

## References

- May MT, Sterne JA, Costagliola D, Sabin CA, Phillips AN, et al. (2006) HIV treatment response and prognosis in Europe and North America in the first decade of highly active antiretroviral therapy: a collaborative analysis. *Lancet* 368: 451–458.
- Vo TT, Ledergerber B, Keiser O, Hirschel B, Furrer H, et al. (2008) Durability and outcome of initial antiretroviral treatments received during 2000–2005 by patients in the Swiss HIV Cohort Study. *J Infect Dis* 197: 1685–1694.
- Egger M, May M, Chene G, Phillips AN, Ledergerber B, et al. (2002) Prognosis of HIV-1-infected patients starting highly active antiretroviral therapy: a collaborative analysis of prospective studies. *Lancet* 360: 119–129.
- Chene G, Sterne JA, May M, Costagliola D, Ledergerber B, et al. (2003) Prognostic importance of initial response in HIV-1 infected patients starting potent antiretroviral therapy: analysis of prospective studies. *Lancet* 362: 679–686.
- Panel on Antiretroviral Guidelines for Adults and Adolescents (2011) Guidelines for the use of antiretroviral agents in HIV-1-infected adults and adolescents. Department of Health and Human Services. Available: <http://www.aidsinfo.nih.gov/ContentFiles/AdultandAdolescentGL.pdf>. Accessed 17 October 2011.
- Therneau TM (1996) Extending the Cox model. Mayo Clinic, Rochester, Minnesota, Department of Health Science Research. Available: <http://mayoresearch.mayo.edu/mayo/research/biostat/techreports.cfm>. Accessed 22 August 2011.
- Castro KG, Ward JW, Slutsker L, Buchler JW, Jaffe HW, et al. (1992) 1993 Revised classification system for HIV infection and expanded surveillance case definition for AIDS among adolescents and adults. Department of Health and Human Services. Available: <http://www.cdc.gov/mmwr/preview/mmwrhtml/00018871.htm>. Accessed 12 November 2011.
- Greenland S (1995) Dose-response and trend analysis in epidemiology: alternatives to categorical analysis. *Epidemiology* 6: 356–365.
- Glidden DV, Vittinghoff E (2004) Modelling clustered survival data from multicentre clinical trials. *Stat Med* 23: 369–388.
- Altman DG, De Stavola BL (1994) Practical problems in fitting a proportional hazards model to data with updated measurements of the covariates. *Stat Med* 13: 301–341.
- Hess KR (1995) Graphical methods for assessing violations of the proportional hazards assumption in Cox regression. *Stat Med* 14: 1707–1723.
- Bellera CA, MacGrogan G, Debled M, de Lara CT, Brouste V, et al. (2010) Variables with time-varying effects and the Cox model: some statistical concepts illustrated with a prognostic factor study in breast cancer. *BMC Med Res Methodol* 10: 20.
- Sabin CA, Smith CJ, d'Arminio MA, Battegay M, Gabiano C, et al. (2008) Response to combination antiretroviral therapy: variation by age. *AIDS* 22: 1463–1473.
- Lodwick R, Costagliola D, Reiss P, Torti C, Teira R, et al. (2010) Triple-class virologic failure in HIV-infected patients undergoing antiretroviral therapy for up to 10 years. *Arch Intern Med* 170: 410–419.
- Putter H, Fiocco M, Geskus RB (2007) Tutorial in biostatistics: competing risks and multi-state models. *Stat Med* 26: 2389–2430.
- Snapinn SM, Jiang Q, Iglewicz B (2005) Illustrating the impact of a time-varying covariate with an extended Kaplan-Meier estimator. *American Statistician* 59: 301–307.
- Douek DC, Roederer M, Koup RA (2009) Emerging concepts in the immunopathogenesis of AIDS. *Annu Rev Med* 60: 471–484.
- Estes JD, Haase AT, Schacker TW (2008) The role of collagen deposition in depleting CD4+ T cells and limiting reconstitution in HIV-1 and SIV infections through damage to the secondary lymphoid organ niche. *Semin Immunol* 20: 181–186.
- Ledergerber B, Lundgren JD, Walker AS, Sabin C, Justice A, et al. (2004) Predictors of trend in CD4-positive T-cell count and mortality among HIV-1-infected individuals with virological failure to all three antiretroviral-drug classes. *Lancet* 364: 51–62.
- Kaufmann GR, Elzi L, Weber R, Furrer H, Giulieri S, et al. (2011) Interruptions of cART limits CD4 T-cell recovery and increases the risk for opportunistic complications and death. *AIDS* 25: 441–451.
- Phillips AN, Lundgren JD (2006) The CD4 lymphocyte count and risk of clinical progression. *Curr Opin HIV AIDS* 1: 43–49.
- Hogg RS, Yip B, Chan KJ, Wood E, Craib KJ, et al. (2001) Rates of disease progression by baseline CD4 cell count and viral load after initiating triple-drug therapy. *JAMA* 286: 2568–2577.
- Bycott P, Taylor J (1998) A comparison of smoothing techniques for CD4 data measured with error in a time-dependent Cox proportional hazards model. *Stat Med* 17: 2061–2077.
- Andersen PK, Liestol K (2003) Attenuation caused by infrequently updated covariates in survival analysis. *Biostatistics* 4: 633–649.
- Hernan MA, Hernandez-Diaz S, Werler MM, Mitchell AA (2002) Causal knowledge as a prerequisite for confounding evaluation: an application to birth defects epidemiology. *Am J Epidemiol* 155: 176–184.
- Phillips A, Pezzotti P (2004) Short-term risk of AIDS according to current CD4 cell count and viral load in antiretroviral drug-naïve individuals and those treated in the monotherapy era. *AIDS* 18: 51–58.
- Mocroft A, Ledergerber B, Zilmer K, Kirk O, Hirschel B, et al. (2007) Short-term clinical disease progression in HIV-1-positive patients taking combination antiretroviral therapy: the EuroSIDA risk-score. *AIDS* 21: 1867–1875.
- Antiretroviral Therapy Cohort Collaboration (2010) Causes of death in HIV-1-infected patients treated with antiretroviral therapy, 1996–2006: collaborative analysis of 13 HIV cohort studies. *Clin Infect Dis* 50: 1387–1396.
- Sterne JA, May M, Costagliola D, de Wolf F, Phillips AN, et al. (2009) Timing of initiation of antiretroviral therapy in AIDS-free HIV-1-infected patients: a collaborative analysis of 18 HIV cohort studies. *Lancet* 373: 1352–1363.
- Kitahata MM, Gange SJ, Abraham AG, Merriman B, Saag MS, et al. (2009) Effect of early versus deferred antiretroviral therapy for HIV on survival. *N Engl J Med* 360: 1815–1826.
- Wolbers M, Battegay M, Hirschel B, Furrer H, Cavasini M, et al. (2007) CD4+ T-cell count increase in HIV-1-infected patients with suppressed viral load within 1 year after start of antiretroviral therapy. *Antivir Ther* 12: 889–897.
- Greub G, Ledergerber B, Battegay M, Grob P, Perrin L, et al. (2000) Clinical progression, survival, and immune recovery during antiretroviral therapy in



- patients with HIV-1 and hepatitis C virus coinfection: the Swiss HIV Cohort Study. *Lancet* 356: 1800–1805.
33. Potter M, Oduyungbo A, Yang H, Saeed S, Klein MB (2010) Impact of hepatitis C viral replication on CD4+ T-lymphocyte progression in HIV-HCV coinfection before and after antiretroviral therapy. *AIDS* 24: 1857–1865.
  34. Justice AC (2010) Commentary: Treated HIV infection is a chronic disease: the case against cause of death analyses. *Int J Epidemiol* 39: 146–148.
  35. Smith C, Sabin CA, Lundgren JD, Thiebaut R, Weber R, et al. (2010) Factors associated with specific causes of death amongst HIV-positive individuals in the D:A:D Study. *AIDS* 24: 1537–1548.
  36. Loutfy MR, Genebat M, Moore D, Raboud J, Chan K, et al. (2010) A CD4+ cell count <200 cells per cubic millimeter at 2 years after initiation of combination antiretroviral therapy is associated with increased mortality in HIV-infected individuals with viral suppression. *J Acquir Immune Defic Syndr* 55: 451–459.
  37. Kelley CF, Kitchen CM, Hunt PW, Rodriguez B, Hecht FM, et al. (2009) Incomplete peripheral CD4+ cell count restoration in HIV-infected patients receiving long-term antiretroviral treatment. *Clin Infect Dis* 48: 787–794.
  38. Abrams D, Levy Y, Losso MH, Babiker A, Collins G, et al. (2009) Interleukin-2 therapy in patients with HIV infection. *N Engl J Med* 361: 1548–1559.
  39. Hatano H, Hayes TL, Dahl V, Sinclair E, Lee TH, et al. (2011) A randomized, controlled trial of raltegravir intensification in antiretroviral-treated, HIV-infected patients with a suboptimal CD4+ T cell response. *J Infect Dis* 203: 960–968.
  40. Keiser O, Anastos K, Schechter M, Balestre E, Myer L, et al. (2008) Antiretroviral therapy in resource-limited settings 1996 to 2006: patient characteristics, treatment regimens and monitoring in sub-Saharan Africa, Asia and Latin America. *Trop Med Int Health* 13: 870–879.
  41. Bartlett JA, Shao JF (2009) Successes, challenges, and limitations of current antiretroviral therapy in low-income and middle-income countries. *Lancet Infect Dis* 9: 637–649.

## Editors' Summary

**Background.** Currently, about 34 million people are infected with HIV and every year nearly 3 million people are newly infected with this virus, which causes AIDS. Most people do not become ill immediately after infection with HIV although some develop a short, flu-like illness (a "seroconversion" illness). The next stage of HIV infection, which may last up to 10 years, also has no major symptoms but, during this stage, HIV slowly destroys immune system cells (including CD4 cells, a type of lymphocyte). Eventually, the immune system can no longer fight off infections by other disease-causing organisms and HIV-positive people then develop one or more AIDS-defining condition(s), including severe but unusual infections, Kaposi sarcoma (a skin cancer), and non-Hodgkin lymphoma (a cancer of the lymph nodes). Many of these AIDS-defining conditions are life-threatening and, in the past, HIV-positive people died on average within 10 years of infection. Nowadays, although there is still no cure for HIV infection, combination antiretroviral therapy (cART; a cocktail of powerful antiretroviral drugs) has turned HIV/AIDS into a chronic, treatable condition, at least in developed countries.

**Why Was This Study Done?** Most HIV-positive adults achieve viral suppression within a year of starting cART. That is, the number of copies of the virus in their blood drops to below 50 copies/ml. But what is the likely clinical outcome for patients who achieve viral suppression and what is their risk of developing a new AIDS-defining condition or of dying? For people starting cART for the first time, the number of CD4 cells in the blood when cART is initiated provides a strong indication of an individual's likely clinical outcome. Specifically, people who start cART when they have a high CD4 cell count tend to do better than people who start treatment when they have a low CD4 cell count. In this study, the researchers use data collected by the Collaboration of Observational HIV Epidemiological Research in Europe (COHERE) to estimate the association between CD4 cell count and progression to a new AIDS-defining event or death among patients who have achieved viral suppression while on cART.

**What Did the Researchers Do and Find?** The researchers identified more than 75,000 patients in the COHERE database who, between them, had had more than 104,000 episodes (periods) of viral suppression while on cART and who had had their CD4 cell count determined shortly before or during their viral suppression episodes. The researchers then used stratified multivariate Cox models (a type of statistical analysis method) to estimate the association between CD4 cell counts and the occurrence of a new AIDS-defining event or death. Among the patients included in the study, the mortality (death) rate was 4.8 per 1,000 years of viral

suppression. The highest rates of new AIDS-defining events or death were seen in those patients with less than 50 CD4 cells/ $\mu$ l blood and a higher CD4 cell count was associated with a reduced risk of a new AIDS-defining event or death. Finally, among those patients with a CD4 cell count below 200 cells/ $\mu$ l, the risk of progression decreased over time for those patients with higher CD4 cell counts.

**What Do These Findings Mean?** These findings suggest that, although new AIDS-defining events and death are uncommon among patients whose viral load is suppressed by cART, the risk of a new AIDS-defining event or death follows a CD4 cell count gradient with the patients with the highest CD4 cell counts having the lowest risk of a new AIDS-defining event or death. The findings also suggest that higher CD4 cell counts provide the greatest benefit for patients with a CD4 cell count below 200 cells/ $\mu$ l blood. These findings have two main clinical implications. First, they add to the evidence that suggests that, to facilitate immune system recovery, cART should be started when a patient's CD4 cell count is between 350 and 500 cells/ $\mu$ l blood, the current recommended range for cART initiation. Unfortunately, most patients in resource-limited settings only start cART when their CD4 cell count is below 200 cells/ $\mu$ l. Second, these findings suggest that patients with sustained viral suppression but low CD4 cell counts should be monitored regularly to ensure that any life-threatening AIDS-defining events are dealt with quickly and effectively.

**Additional Information.** Please access these Web sites via the online version of this summary at <http://dx.doi.org/10.1371/journal.pmed.1001194>.

- Information is available from the US National Institute of Allergy and infectious diseases on HIV infection and AIDS
- NAM/aidsmap provides basic information about HIV/AIDS, and summaries of recent research findings on HIV care and treatment
- Information is available from Avert, an international AIDS charity on many aspects of HIV/AIDS, including detailed information on HIV treatment and care (in English and Spanish)
- The World Health Organization's 2010 antiretroviral therapy guidelines provide recommendations on when to initiate cART
- Information about COHERE is available
- Patient stories about living with HIV/AIDS are available through Avert and through the charity website Healthtalkonline
